# Supplementary material
Source: Springer Nature journal article supplement (https://www.springermedizin.de/resource/supplementary/12889_2012_5336_MOESM2_ESM.pdf/9495124)

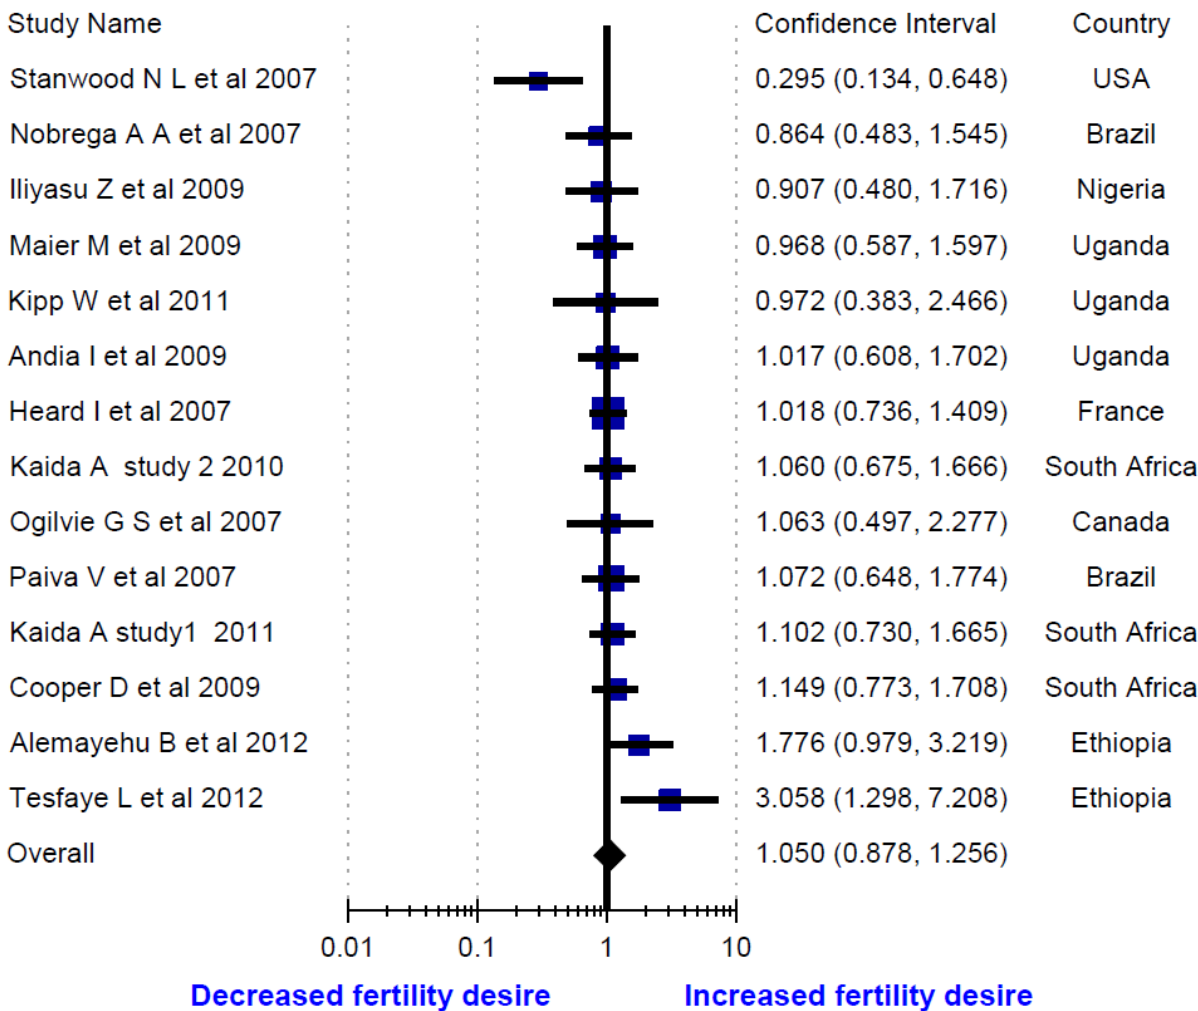

| Heterogeneity test |                |        |        |           |
|--------------------|----------------|--------|--------|-----------|
| Tau <sup>2</sup>   | I <sup>2</sup> | Q      | DF     | P-val (Q) |
| 0.039              | 35.1%          | 20.036 | 13.000 | 0.094     |

Supplement: MOESM2 [file 9495124]
